# Supplementary material for: Sol–gel entrapped light harvesting antennas: immobilization and stabilization of chlorosomes for energy harvesting
Source: Royal Society of Chemistry journal article supplement (doi:10.1039/c2jm34357f), 2012-01-01
Supplement: c2jm34357f.pdf [file c2jm34357f.pdf]

## Supporting Information

### **Sol-gel Entrapped Light Harvesting Antennas: Immobilization and Stabilization of Chlorosomes for Energy Harvesting**

William B. O'Dell<sup>1</sup>, Kayla J. Beatty<sup>1</sup>, Kuo-Hsiang Tang<sup>2</sup>, Robert E. Blankenship<sup>3</sup>, Volker S. Urban<sup>1</sup>, and Hugh O'Neill<sup>1\*</sup>

<sup>1</sup>Biology and Soft Matter Division, Oak Ridge National Laboratory, Oak Ridge, TN 37831

<sup>2</sup>Carlson School of Chemistry and Biochemistry, Clark University, Worcester, MA 01610

<sup>3</sup>Department of Chemistry and Biochemistry, Washington University in St. Louis, St. Louis MO 63130

**Copyright Statement:** The submitted manuscript has been authored by a contractor of the U.S. Government under Contract DE-AC05-00OR22725. Accordingly, the U.S. Government retains a nonexclusive royalty-free license to publish or reproduce the published form of this contribution, or allow others to do so, for U.S. Government purposes.

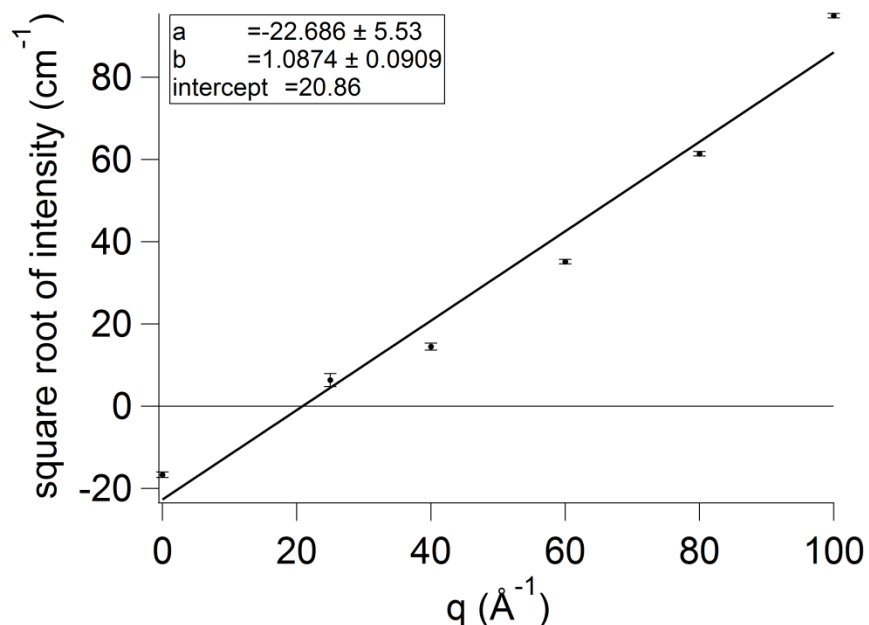

**Figure S1. Determination of chlorosome contrast match point from variation series data.** The variation series was previously reported by Tang et al.<sup>1</sup> The x-intercept indicates a contrast match point at  $\sim 21\%$  D<sub>2</sub>O.

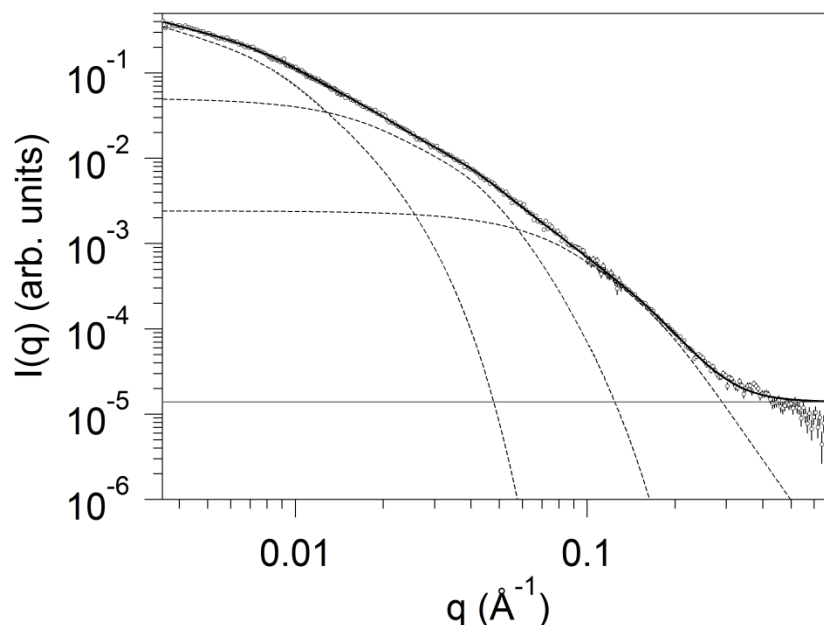

**Figure S2. Fit of SANS data from FH control gel in 100% D<sub>2</sub>O.** Scattering data are shown as open circles. The broken lines are the intensities calculated for each level in the Beaucage-type model<sup>2,3</sup> which when added to the incoherent background (thin solid line) sum to give the total calculated intensity (thick solid line).

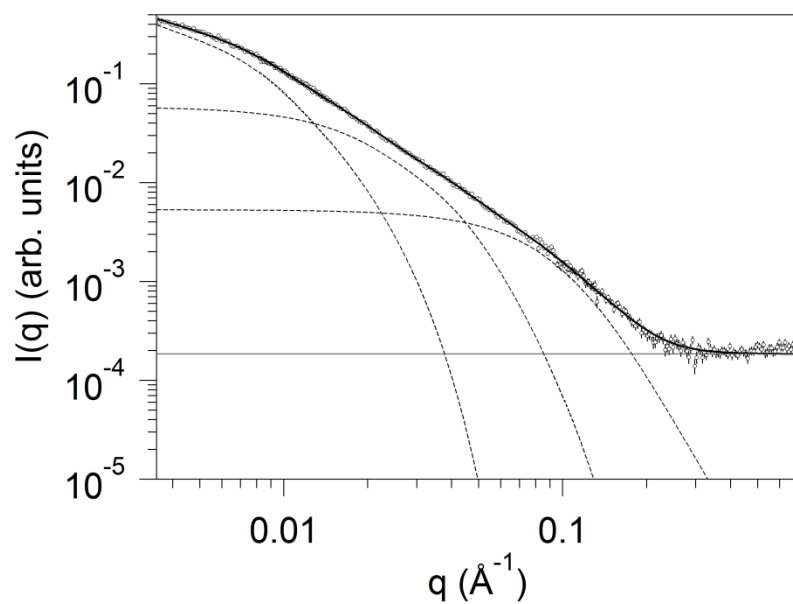

Figure S3. Fit of SANS data from FH control gel in 20%  $D_2O$ .

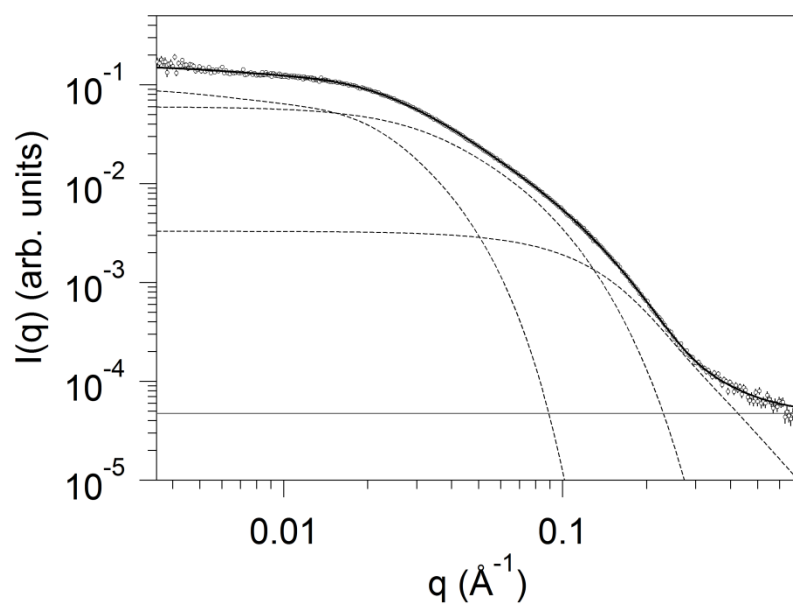

Figure S4. Fit of SANS data from PH control gel in 100%  $D_2O$ .

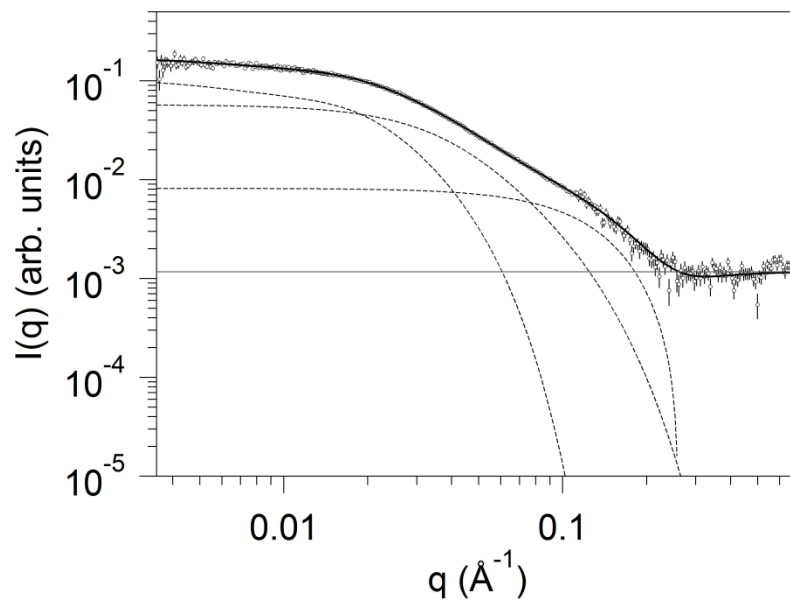

Figure S5. Fit of SANS data from PH control gel in 20%  $D_2O$ .

### References

- (1) Tang, K. H.; Urban, V. S.; Wen, J. Z.; Xin, Y. Y.; Blankenship, R. E. *Biophysical Journal* **2010**, *99*, 2398-2407.
- (2) Beaucage, G. *Journal of Applied Crystallography* **1996**, *29*, 134-146.
- (3) Beaucage, G. *Journal of Applied Crystallography* **1995**, *28*, 717-728.
